# Supplementary material for: From testing to treatment: a mixed-methods study assessing organisational readiness for intravenous iron for pregnant women with anaemia in Bangladesh
Source: Research Square preprint supplement (doi:10.21203/rs.3.rs-8013520/v1), 2026-01-16
Supplement: Supplementary file 1 [file 12cc81910b6ced985fff17dd.docx]

**Article title:** From testing to treatment: a mixed-methods study assessing organisational readiness for intravenous iron for pregnant women with anaemia in Bangladesh

**Journal name:** Global Implementation Research and Applications

**Corresponding author:** Ebony Verbunt, The University of Melbourne, [ebony.verbunt@unimelb.edu.au](mailto:ebony.verbunt@unimelb.edu.au)

**S2 Appendix – Baseline Health Facility Readiness Assessment Questionnaire**

|  | **Indicators** | **Response** | **Notes** |
| --- | --- | --- | --- |
| **1** | **General characteristics** | | |
| **a.** | What is the union of your facility? |  |  |
| **b.** | Is your facility within a rural or urban area? |  |  |
| **c.** | What type of health worker are you? |  |  |
| **d.** | What type of health workers are employed at this facility, and how many? |  |  |
| **e.** | Does your facility have a pathology laboratory/diagnostic facility on-site? |  |  |
| **f.** | How are pregnant women tested for anaemia? *(multiple responses allowed)* | Physical examination  Colour scale  HemoCue  Hemoglobinometer  Complete blood count  Other (please specify) |  |
| **g.** | How are pregnant women treated for anaemia?  (*multiple responses allowed)* | Counselling (e.g., on type of food pregnant women should eat)  Oral iron tablets  Intravenous iron  Blood transfusion  Other (please specify) |  |
| **h.** | Do you categorise anaemia status? (e.g., mild, moderate, severe) | Yes  No |  |
| **i.** | If yes, how do you determine the category of anaemia status? (e.g., mild, moderate, severe) |  |  |
| **j.** | If no, why do you not categorise anaemia status? |  |  |
| **k.** | How many pregnant women do you see in a month? |  |  |
| **l.** | How many pregnant women do you identify as anaemic in a month? |  |  |
| **2** | **Medical records and data management system** | | |
| **a.** | What type of medical record structure does your facility have? | Paper  Electronic  Paper and electronic |  |
| **b.** | Is anaemia testing currently included in a pregnant woman’s medical record? | Yes  No | If possible, observe a subset of records |
| **c.** | Is anaemia status currently included in a pregnant woman’s medical record? | Yes  No |
| **d.** | Is anaemia treatment currently included in a pregnant woman’s medical record? | Yes  No  Referral for treatment at other facility |
| **3** | **Amenities** | | |
| **a.** | Does your facility have power/electricity? | Yes  No |  |
| **b.** | Does your facility have back-up power/electricity?  (e.g., generator, solar system, isolated power supply) | Yes  No |  |
| **c.** | Does your facility have a refrigerator? | Yes  No |  |
| **d.** | If no, what is your alternative arrangement? | Icebox  Other (please specify)  No |  |
| **e.** | What is the most commonly used source of water for the facility at this time? | Piped (supplied)  Piped (not supplied)  Public tap  Tubewell/borehole  Other (please specify) |  |
| **f.** | Is water available from this source on facility premises? | Yes, inside the facility  No, outside the facility grounds |  |
| **g.** | Do you have a separate/private room for patient consultations that can maintain the privacy of women? | Yes  No |  |
| **h.** | Do you have a washroom available? | Yes  No |  |
| **4** | **Protocols/Guidelines and Training** | | |
|  | *Instructions: Say the following –*  *‘Please tell me if the following documents are available in the facility today:*  *(if yes, ask to see the document)’* | | |
| **a.** | Protocols/Guidelines on antenatal care | Yes  No |  |
| **b.** | Protocols/Guidelines for testing anaemia in pregnant women | Yes  No |  |
| **c.** | Protocols/Guidelines for treating anaemia in pregnant women | Yes  No |  |
| **d.** | Have health workers been trained in testing pregnant women for anaemia? | Yes  No |  |
| **e.** | Have health workers been trained in treating pregnant women for anaemia? | Yes  No |  |
| **5** | **Infection control** |  |  |
| **a.** | Does your facility have regular supply of hand-washing soap/liquid soap? | Yes  No |  |
| **b.** | Does your facility have regular supply of disposable latex gloves? | Yes  No |  |
| **c.** | Does your facility have regular supply of environmental disinfectant (e.g., chlorine, alcohol)? | Yes  No |  |
| **d.** | Does your facility have regular supply of disposable syringes with disposable needles? | Yes  No |  |
| **e.** | Does your facility have appropriate storage of infectious waste? (e.g., waste bin) | Yes  No |  |
| **f.** | Does your facility have appropriate storage of sharps waste? | Yes  No |  |
| **g.** | Does your facility have appropriate guidelines on standard precautions for infection prevention? | Yes  No |  |
| **6** | **Supplements** | | |
|  | *Instructions: Ask to see supplements if available* | | |
| **a.** | Does your facility have regular supply of iron and folic acid tablets? | Yes  No |  |
| **b.** | Does your facility have regular supply of calcium? | Yes  No |  |
| **c.** | Does your facility have regular supply of Multiple Micronutrient Supplements (MMS)? | Yes  No |  |
| **d.** | Does your facility have regular supply of anti-helminthics? | Yes  No |  |
| **7** | **Equipment – antenatal care** | | |
|  | *Instructions: Where possible, ask to see and record functionality of equipment* | | |
| **a.** | Does your facility have a haemoglobin testing device? | Yes  No |  |
| **b.** | If yes, what type of anaemia testing device does your facility have? | Hemoglobinometer  Colour scale  HemoCue  Complete blood count  Other (please specify) |  |
| **c.** | Does your facility have a weight machine? | Yes  No |  |
| **d.** | Does your facility have a stadiometer for measuring height? | Yes  No |  |
| **e.** | Does your facility have a thermometer? | Yes  No |  |
| **f.** | Does your facility have a stethoscope? | Yes  No |  |
| **g.** | Does your facility have blood pressure (bp) machine? | Yes  No |  |
| **h.** | If yes, what type of blood pressure (bp) machine does your facility have? | Yes  No |  |
| **i.** | Does your facility have a glucometer? | Yes  No |  |
| **j.** | Does your facility have sterilization equipment? | Yes  No |  |
| **k.** | If yes, what type of sterilization equipment? | Dry heat sterilizer  Autoclave  Other (please specify) |  |
| **8** | **Resources – intravenous iron treatment** | | |
|  | *Instructions: Where possible, ask to see and record functionality of equipment* | | |
| **a.** | Does your facility have a room where patients can receive intravenous iron treatment, with both auditory and visual privacy? | Yes  No |  |
| **b.** | Does your facility have a medicine room in which intravenous iron solution could be stored? | Yes  No |  |
| **c.** | Does your facility have an intravenous infusion pole? | Yes  No |  |
| **d.** | Does your facility have alcohol swabs? | Yes  No |  |
| **e.** | Does your facility have gauze? | Yes  No |  |
| **f.** | Does your facility have 22-gauge (blue) cannulas? | Yes  No |  |
| **g.** | Does your facility have adhesive tape or cannula dressing? | Yes  No |  |
| **h.** | Does your facility have 5ml syringes with needles? | Yes  No |  |
| **i.** | Does your facility have 20ml syringes with needles? | Yes  No |  |
| **j.** | Does your facility have ambu bag (for adults)? | Yes  No |  |
| **k.** | Does your facility have adrenaline? | Yes  No |  |
| **l.** | Does your facility have hydrocortisone? | Yes  No |  |
| **m.** | Does your facility have anti-histamine? | Yes  No |  |
| **n.** | If yes, what type of anti-histamine? | Injection  Tablet  Other (please specify) |  |
| **o.** | Does your facility have oxygen? | Yes  No |  |
| **p.** | If yes, what type of oxygen? | Cylinders  Concentrators  Other (please specify) |  |
