# Supplementary material for: From testing to treatment: a mixed-methods study assessing organisational readiness for intravenous iron for pregnant women with anaemia in Bangladesh
Source: Research Square preprint supplement (doi:10.21203/rs.3.rs-8013520/v1), 2026-01-16
Supplement: Supplementary file 2 [file 45d2243465c05b5d97224dad.docx]

**Article title:** From testing to treatment: a mixed-methods study assessing organisational readiness for intravenous iron for pregnant women with anaemia in Bangladesh

**Journal name:** Global Implementation Research and Applications

**Corresponding author:** Ebony Verbunt, The University of Melbourne, [ebony.verbunt@unimelb.edu.au](mailto:ebony.verbunt@unimelb.edu.au)

**S1 Appendix** – **Author reflexivity statement**

1. **How does the study address local research and policy priorities?**

Alongside investments to ensure that all pregnant women in Bangladesh are tested for anaemia, and the promising use of intravenous iron to improve treatment outcomes, the EDIVA programme: ‘**E**fficacy and **D**emonstration of **I**ntra**V**enous iron for **A**naemia in pregnancy’ was launched in 2021. The programme is led by the research institute icddr,b in Bangladesh, in collaboration with WEHI and the University of Melbourne in Australia. The EDIVA programme is supported by the Bangladesh Ministry of Health and Family Welfare, demonstrating its alignment with local research and policy priorities. For this particular paper, the research questions and analysis plan were developed by EV, with guidance from her PhD supervisors (KHP, MAB, CV) and input from icddr,b researchers in Bangladesh (ABMR, BKS, AMQR, JDH).

1. **How were local researchers involved in study design?**

Researchers from icddr,b (ABMR, BKS, AMQR, JDH) contributed to the development of all data collection tools through in-person or online discussions.

1. **How has funding been used to support the local research team?**

Funding has been used to support the salaries of the icddr,b research team (ABMR, BKS, AMQR, JDH)

1. **How are research staff who conduce data collection acknowledged?**

This paper is one of several outputs from the EDIVA programme. Members of the icddr,b study team are included as authors or acknowledged for their contributions.

1. **Do all members of the research partnership have access to de-identified study data?**

Yes, all members of the research partnership have access to de-identified study data**.**

1. **How was data used to develop analytical skills within the partnership?**

To analyse the qualitative interviews with health workers we used inductive thematic analysis. The field team, consisting of researchers from icddr,b (ABMR, SA, FK, ABS, AYS) and the University of Melbourne (EV) met in the evenings following interviews to discuss and review emerging themes from the data. Based on these discussions, EV and ABMR developed the initial coding frameworks for anaemia testing and intravenous iron treatment. In the months following data collection, EV and ABMR refined and finalised the frameworks through online discussions.

1. **How have research partners collaborated in interpreting study data?**

As discussed in #6, researchers from icddr,b were involved in the analysis and interpretation of the qualitative data. They also participated in discussions evaluating the overall organisational readiness for anaemia testing and intravenous iron treatment for pregnant women in Bangladesh’s primary health care system. Additionally, ABMR, BKS, AMQR, and JDH contributed to developing the research and policy implications of our findings, including for the EDIVA Demonstration Project.

1. **How were research partners supported to develop writing skills?**

The research team included senior academics (KHP, MAB, CV) who provided supervision for EV’s doctoral research. Researchers from icddr,b (including ABMR, BKS, AMQR, and JDH) are lead, contributing, or senior authors on publications from the EDIVA programme.

1. **How will research products be shared to address local needs?**

All papers resulting from the EDIVA Programme will be published open-access, with abstracts made available in Bangla where possible. Results will also be presented at relevant conferences. Members of the icddr,b research team will engage with policymakers from the Bangladesh Ministry of Health and Family Welfare to share findings from the EDIVA programme.

1. **How is the leadership, contribution, and ownership of this work by LMIC researchers recognised within the authorship?**

EV led this work and is therefore the first and corresponding author. ABMR, BKS, and AMQR (icddr,b) had key roles in study planning, data collection, and analysis, and are therefore second, third, and fourth authors, respectively. JDH (icddr,b) and SRP (University of Melbourne/WEHI) are the principal investigators of the EDIVA programme.

1. **How have early career researchers across the partnership been included within the authorship team?**

The first author, EV, is a PhD candidate at the University of Melbourne, and the study forms part of her doctoral research. ABMR (icddr,b) is an early career researcher who is interested in building his academic track record.

1. **How has gender balance been addressed within the authorship?**

Five authors are female (EV, JDH, MAB, CV, KHP) and four authors are male (ABMR, BKS, AMQR, SRP).

1. **How has the project contributed to training of LMIC researchers?**

As outlined in #6, #7, and #8, researchers from icddr,b have contributed to data analysis and interpretation for this study, as well as the writing of publications arising from the EDIVA programme.

1. **How has the project contributed to improvements in local infrastructure?**

This project has not directly contributed to improvements in local infrastructure.

1. **What safeguarding procedures were used to protect local study participants and researchers?**

Prior to data collection, all study participants received a plain language statement in Bangla. This statement explained the purpose of the research activity, what participation involved, and any potential risks and benefits. Participants were informed that their involvement was voluntary and that they could withdraw from the study at any time. Written consent was obtained from each participant before data collection began. To ensure confidentiality, all data were de-identified prior to analysis. During the data collection period, the field team met regularly to debrief and address any issues that arose.
