# Supplementary material for: From testing to treatment: a mixed-methods study assessing organisational readiness for intravenous iron for pregnant women with anaemia in Bangladesh
Source: Research Square preprint supplement (doi:10.21203/rs.3.rs-8013520/v1), 2026-01-16
Supplement: Supplementary file 3 [file 5669237ea0602484f9915d2e.docx]

**Article title:** From testing to treatment: a mixed-methods study assessing organisational readiness for intravenous iron for pregnant women with anaemia in Bangladesh

**Journal name:** Global Implementation Research and Applications

**Corresponding author:** Ebony Verbunt, The University of Melbourne, [ebony.verbunt@unimelb.edu.au](mailto:ebony.verbunt@unimelb.edu.au)

**S3 Appendix – Organisational Readiness for Implementing Change (ORIC) questionnaire**

**Organisational Readiness for Implementing Change – Anaemia Testing**

| **Demographic information** | | | | | | | |
| --- | --- | --- | --- | --- | --- | --- | --- |
| What is your age? বয়স কত? |  | In which union is your health facility? কোন ইউনিয়নে স্বাস্থ্যসেবা কেন্দ্র? | | | |  | |
| What is your gender? লিঙ্গ কি? |  | What is your role in the health facility? আপনার ভুমিকা কি? | | | |  | |
| What religion do you practice? ধর্ম কি? |  | How many years have you been in this role? কত বছর ধরে এই ভুমিকা পালন করেছেন? | | | |  | |
| What type of health facility do you work at? (CC, UH&FWC, UHC) কোন ধরনের স্বাস্থ্যকেন্দ্রে কাজ করেন? |  | What is your job status? *(Please circle your response)*  চাকরির ধরণ কোনটা? (গোল দাগ দিন) | | | | Full-time  Part-time | |
| **Please tick (ü) your response to each question below. Please answer honestly, you will not face any consequences for providing truthful responses. (প্রতিটি পশ্নের উত্তরের ঘরে টিক চিহ্ন দিন। অনুগ্রহ করে সততার সাথে উত্তর দিন, সত্য প্রতিক্রিয়া প্রদানের জন্য আপনাকে কোন পরিণতির সম্মুখীন হতে হবে না।)** | | | | | | | |
|  | | **I disagree**  দ্বিমত | **I somewhat disagree**  কিছুটা দ্বিমত | **I neither agree or disagree**  একমত বা দ্বিমত কোনটাই নয় | **I somewhat agree**  কিছুটা একমত | | **I agree**  একমত |
| 1. We want to implement anaemia testing using a HemoCue for pregnant women [আমরা গর্ভবতী মহিলাদের জন্য হেমোকিউ ব্যবহার করে অ্যানিমিয়ার স্ক্রীনিং কার্যক্রম বাস্তবায়ন করতে চাই ।] | |  |  |  |  | |  |
| 1. We are committed to implementing anaemia testing using a HemoCue for pregnant women [আমরা গর্ভবতী মহিলাদের জন্য হেমোকিউ ব্যবহার করে অ্যানিমিয়ার স্ক্রীনিং কার্যক্রম বাস্তবায়ন করতে প্রতিশ্রুতিবদ্ধ।] | |  |  |  |  | |  |
| 1. We are motivated to implement anaemia testing using a HemoCue for pregnant women [আমরা গর্ভবতী মহিলাদের জন্য হেমোকিউ ব্যবহার করে অ্যানিমিয়ার স্ক্রীনিং কার্যক্রম বাস্তবায়ন করতে অনুপ্রাণিত/উৎসাহী ।] | |  |  |  |  | |  |
| 1. We are determined to implement anaemia testing using a HemoCue for pregnant women [আমরা গর্ভবতী মহিলাদের জন্য হেমোকিউ ব্যবহার করে অ্যানিমিয়ার স্ক্রীনিং কার্যক্রম বাস্তবায়ন করতে দৃঢ়প্রতিজ্ঞ।] | |  |  |  |  | |  |
| 1. We will do whatever it takes to implement anaemia testing using a HemoCue [আমরা গর্ভবতী মহিলাদের জন্য হেমোকিউ ব্যবহার করে অ্যানিমিয়ার স্ক্রীনিং কার্যক্রম বাস্তবায়ন করতে যা যা করা প্রয়োজন, তা করব। | |  |  |  |  | |  |
| 1. We feel confident that we can keep the momentum going in implementing anaemia testing using a HemoCue for pregnant women [আমরা আত্মবিশ্বাসী যে, আমরা গর্ভবতী মহিলাদের জন্য হেমোকিউ ব্যবহার করে অ্যানিমিয়ার স্ক্রীনিং কার্যক্রমের ধারাবাহিকতা বজায় (কার্যকর) রাখতে পারব।] | |  |  |  |  | |  |
| 1. We feel confident that we can keep track of progress in implementing anaemia testing using a HemoCue for pregnant women [আমরা আত্মবিশ্বাসী যে, আমরা গর্ভবতী মহিলাদের জন্য হেমোকিউ ব্যবহার করে অ্যানিমিয়ার স্ক্রীনিং কার্যক্রম বাস্তবায়নের অগ্রগতির ট্র্যাক রাখতে পারব।] (লাইন) | |  |  |  |  | |  |
| 1. We feel confident that our health facility can get people invested in implementing anaemia testing using a HemoCue for pregnant women [আমরা আত্মবিশ্বাসী যে, আমাদের স্বাস্থ্য সেবা কেন্দ্র গর্ভবতী মহিলাদের হেমোকিউ ব্যবহার করে অ্যানিমিয়ার স্ক্রীনিং সম্পন্ন করার জন্য কর্মীদের উপর বিনিয়োগ করতে পারে।] (ট্রেইনিং দেওয়া) | |  |  |  |  | |  |
| 1. We feel confident that our health facility can support people as they adjust to implementing anaemia testing using a HemoCue for pregnant women [আমরা আত্মবিশ্বাসী যে, আমাদের স্বাস্থ্য সেবা কেন্দ্র কর্মীদের সহায়তা করতে পারে যাতে তারা হেমোকিউ ব্যবহার করে গর্ভবতী মহিলাদের জন্য রক্তস্বল্পতা স্ক্রীনিং কার্যক্রমকে মানিয়ে নিতে পারে।] | |  |  |  |  | |  |
| 1. We feel confident that we can handle the challenges that might arise in implementing anaemia testing using a HemoCue for pregnant women [আমরা আত্মবিশ্বাসী যে, হেমোকিউ ব্যবহার করে গর্ভবতী মহিলাদের অ্যানিমিয়ার স্ক্রীনিং সম্পন্ন করতে যে চ্যালেঞ্জগুলি আসবে সেগুলো মোকাবেলা করতে পারব।] | |  |  |  |  | |  |
| 1. We feel confident that we can coordinate tasks so that implementation goes smoothly [ আমরা আত্মবিশ্বাসী যে, অ্যানিমিয়া স্ক্রীনিং কার্যক্রম ভালভাবে বাস্থবায়ন করার জন্য আমরা নিয়মিত কাজের সাথে তা সমন্বয় করতে পারি] | |  |  |  |  | |  |
| 1. We feel confident that we can manage the politics of implementing the change [ আমরা আত্মবিশ্বাসী যে, আমরা পরিবর্তন বাস্তবায়নের কৌশল/ বাস্তবায়ন-নীতি ম্যানেজ করতে পারব।] (যে কোন পরিবর্তন আসলে তা আমরা ম্যানেজ করতে পারব) | |  |  |  |  | |  |

Thank you for taking the time to complete this questionnaire.

**Organisational Readiness for Implementing Change – Intravenous iron**

| **Demographic information** | | | | | | | |
| --- | --- | --- | --- | --- | --- | --- | --- |
| What is your age? বয়স কত? |  | What is your role in the health facility? আপনার ভুমিকা কি উপজেলা স্বাস্থ্যকন্দ্রে? | | | |  | |
| What is your gender? লিঙ্গ কি? |  |
| What religion do you practice? ধর্ম কি? |  | How many years have you been in this role? কত বছর ধরে এই ভুমিকা পালন করেছেন? | | | |  | |
| What is your job status? *(Please circle your response)* চাকরির ধরণ কোনটা? (গোল দাগ দিন) | | | | Full-time  Part-time | |
| **Please tick (ü) your response to each question below. Please answer honestly, you will not face any consequences for providing truthful responses. (প্রতিটি পশ্নের উত্তরের ঘরে টিক চিহ্ন দিন। অনুগ্রহ করে সততার সাথে উত্তর দিন, সত্য প্রতিক্রিয়া প্রদানের জন্য আপনাকে কোন পরিণতির সম্মুখীন হতে হবে না।)** | | | | | | | |
|  | | **I disagree**  দ্বিমত | **I somewhat disagree** কিছুটা দ্বিমত | **I neither agree or disagree**  একমত বা দ্বিমত কোনটাই নয় | **I somewhat agree**  কিছুটা একমত | | **I agree**  একমত |
| 1. We want to implement the intravenous iron intervention for pregnant women with anaemia [আমরা অ্যানিমিয়ায় আক্রান্ত গর্ভবতী মহিলাদের জন্য আইভি আয়রন কার্যক্রম বাস্তবায়ন করতে চাই।] | |  |  |  |  | |  |
| 1. We are committed to implementing the intravenous iron intervention for pregnant women with anaemia [আমরা অ্যানিমিয়ায় আক্রান্ত গর্ভবতী মহিলাদের জন্য আইভি আয়রন কার্যক্রম বাস্তবায়নে প্রতিশ্রুতিবদ্ধ।] | |  |  |  |  | |  |
| 1. We are motivated to implement the intravenous iron intervention for pregnant women with anaemia [আমরা অ্যানিমিয়ায় আক্রান্ত গর্ভবতী মহিলাদের জন্য আইভি আয়রন কার্যক্রম বাস্তবায়নে করতে অনুপ্রাণিত/উৎসাহী।] | |  |  |  |  | |  |
| 1. We are determined to implement the intravenous iron intervention for pregnant women with anaemia [আমরা অ্যানিমিয়ায় আক্রান্ত গর্ভবতী মহিলাদের জন্য আইভি আয়রন কার্যক্রম বাস্তবায়নে দৃঢ়প্রতিজ্ঞ।] | |  |  |  |  | |  |
| 1. We will do whatever it takes to implement the intravenous iron intervention for pregnant women with anaemia [আমরা অ্যানিমিয়ায় আক্রান্ত গর্ভবতী মহিলাদের জন্য আইভি আয়রন কার্যক্রম বাস্তবায়নে যা যা করা প্রয়োজন, তা করব। | |  |  |  |  | |  |
| 1. We feel confident that we can keep the momentum going in implementing the intravenous iron intervention for pregnant women with anaemia [আমরা আত্মবিশ্বাসী যে আমরা অ্যানিমিয়ায় আক্রান্ত গর্ভবতী মহিলাদের জন্য আইভি আয়রন কার্যক্রম বাস্তবায়নের গতি বজায়/কার্যকর রাখতে পারব।] | |  |  |  |  | |  |
| 1. We feel confident that we can keep track of progress in implementing the intravenous iron intervention for pregnant women with anaemia [আমরা আত্মবিশ্বাসী যে আমরা অ্যানিমিয়ায় আক্রান্ত গর্ভবতী মহিলাদের জন্য আইভি আয়রন কার্যক্রম বাস্তবায়নের অগ্রগতি ট্র্যাক রাখতে পারব।] (লাইন) | |  |  |  |  | |  |
| 1. We feel confident that our health facility can get people invested in implementing the intravenous iron intervention for pregnant women with anaemia আমরা আত্মবিশ্বাসী যে আমাদের স্বাস্থ্য সুবিধা অ্যানিমিয়ায় আক্রান্ত গর্ভবতী মহিলাদের জন্য আইভি আয়রন কার্যক্রম বাস্তবায়নে কর্মীদের উপর বিনিয়োগ করতে পারে।] (ট্রেইনিং দেওয়া) | |  |  |  |  | |  |
| 1. We feel confident that our health facility can support people as they adjust to implementing the intravenous iron intervention for pregnant women with anaemia [আমরা আত্মবিশ্বাসী যে, আমাদের স্বাস্থ্যসেবা কেন্দ্র, সেবা প্রদানকারীদের সহায়তা করতে পারে যাতে তারা আইভি আয়রন বাস্তবায়নের কার্যক্রমকে মানিয়ে নিতে পারে।] | |  |  |  |  | |  |
| 1. We feel confident that we can handle the challenges that might arise in implementing the intravenous iron intervention for pregnant women with anaemia [আমরা আত্মবিশ্বাসী যে অ্যানিমিয়ায় আক্রান্ত গর্ভবতী মহিলাদের আইভি আয়রন কার্যক্রম বাস্তবায়নে উদ্ভূত চ্যালেঞ্জগুলি মোকাবেলা করতে পারব।] | |  |  |  |  | |  |
| 1. We feel confident that we can coordinate tasks so that implementation goes smoothly [ আমরা আত্মবিশ্বাসী যে, আইভি আয়রন কার্যক্রম ভালভাবে বাস্থবায়ন করার জন্য আমরা নিয়মিত কাজের সাথে তা সমন্বয় করতে পারি] | |  |  |  |  | |  |
| 1. We feel confident that we can manage the politics of implementing the change [ আমরা আত্মবিশ্বাসী যে, আমরা পরিবর্তন বাস্তবায়নের কৌশল/ বাস্তবায়ন-নীতি ম্যানেজ করতে পারব।] (যে কোন পরিবর্তন আসলে তা আমরা ম্যানেজ করতে পারব) | |  |  |  |  | |  |

Thank you for taking the time to complete this questionnaire.
