# Supplementary material for: From testing to treatment: a mixed-methods study assessing organisational readiness for intravenous iron for pregnant women with anaemia in Bangladesh
Source: Research Square preprint supplement (doi:10.21203/rs.3.rs-8013520/v1), 2026-01-16
Supplement: Supplementary file 4 [file a2bae30847ad895774f98b34.docx]

**Article title:** From testing to treatment: a mixed-methods study assessing organisational readiness for intravenous iron for pregnant women with anaemia in Bangladesh

**Journal name:** Global Implementation Research and Applications

**Corresponding author:** Ebony Verbunt, The University of Melbourne, [ebony.verbunt@unimelb.edu.au](mailto:ebony.verbunt@unimelb.edu.au)

**S5 Appendix: Baseline health facility readiness assessment data**

**Anaemia testing (n = 20)**

| **Items** | **Frequency (%)** |
| --- | --- |
| Haemoglobin testing capacity (full blood count or point-of-care device) | 6 (30.0) |
| Guideline/Standard Operating Procedure | 0 (0.0) |

**Intravenous iron treatment (n = 6)**

| **Items** | **Frequency (%)** |
| --- | --- |
| **Equipment and room for administration** |  |
| Blood pressure machine | 6 (100.0) |
| Stethoscope | 6 (100.0) |
| Thermometer | 4 (66.7) |
| Storage room | 6 (100.0) |
| Weight machine | 6 (100.0) |
| Intravenous pole | 5 (83.3) |
| Cannular dressing | 4 (66.7) |
| Gauze | 4 (66.7) |
| Alcohol swab | 3 (50.0) |
| Room with auditory and visual privacy | 3 (50.0) |
| 5ml syringes with needles | 3 (50.0) |
| 22-gauge (blue cannula) | 1 (16.7) |
| 20ml syringes with needles | 0 (0.0) |
| **Equipment and medicines for serious adverse events** |  |
| Antihistamine | 6 (100.0) |
| Oxygen | 5 (83.3) |
| Hydrocortisone | 2 (33.3) |
| Adrenaline | 1 (16.7) |
| Ambu bag | 1 (16.7) |
