# Supplementary material for: From testing to treatment: a mixed-methods study assessing organisational readiness for intravenous iron for pregnant women with anaemia in Bangladesh
Source: Research Square preprint supplement (doi:10.21203/rs.3.rs-8013520/v1), 2026-01-16
Supplement: Supplementary file 5 [file d50d677ee63f37716c18ffd3.docx]

**Article title:** From testing to treatment: a mixed-methods study assessing organisational readiness for intravenous iron for pregnant women with anaemia in Bangladesh

**Journal name:** Global Implementation Research and Applications

**Corresponding author:** Ebony Verbunt, The University of Melbourne, [ebony.verbunt@unimelb.edu.au](mailto:ebony.verbunt@unimelb.edu.au)

**S4 Appendix: Interview guidelines**

**Anaemia testing**

**Section 1: Background**

*We would like to start with understanding a bit about your role in your current job:*

1. Could you please introduce yourself and tell me a little about yourself, including your current work position (role and responsibility) and what your training was in? *Prompt: type of maternal and child health related training*
2. How would you describe your work conditions? *Prompt: well-resourced, understaffed, travelling to pregnant women’s homes*
3. How would you describe your workplace culture? *Prompt: collaborative, (un)supportive, relationships with colleagues and supervisors*

**Section 2: Anaemia in pregnant women and testing**

*Thank you for sharing. I would like to now focus on anaemia in pregnant women and testing for anaemia using a HemoCue.*

1. Could you please tell me about your understanding of what anaemia in pregnant women is? *Prompt: how would you define anaemia in pregnant women*
2. How much of an issue do you think anaemia is in pregnant women? *Prompt: prevalence, consequences of anaemia in pregnant women*
3. Prior to working on this study, did you test pregnant women for anaemia? If yes, how did you test pregnant women for anaemia? *Prompt: tools for testing including laboratory tests*
4. Could you please tell me about your understanding of the process of using a HemoCue to test pregnant women for anaemia? *Prompt: testing process (cuvette), measurement process (HemoCue photometer)*
5. How do you think testing pregnant women for anaemia using a HemoCue differs from other testing methods? *Prompt: physical examination, colour scale, venous full blood count; has it improved/not improved the process, why or why not, preference*
6. Could you please tell me about the training you received (from icddr,b) for using a HemoCue to test pregnant women for anaemia? *Prompt: quality of the training, type of training (e.g., hands-on, interactive)*
7. Do you feel any additional training on using a HemoCue to test pregnant women for anaemia is needed? If so, what would you like to receive training on?
8. Could you please tell me about your experience of testing pregnant women for anaemia using a HemoCue? *Prompt: easy, time-consuming*
9. How do pregnant women feel about being tested for anaemia using a HemoCue? *Prompt: high/low acceptability, improved trust in the diagnosis.* Why do they feel that way? Please explain
10. How did the community and family members respond to pregnant women being tested for anaemia using HemoCue? *Prompt: high/low acceptability, potential barriers*
11. How have your colleagues responded to you testing for anaemia in pregnant women using a HemoCue? *Prompt: enthusiastic, (un) supportive*
12. Is there anything that could be done to improve the process of anaemia testing using a HemoCue? Please explain. *Prompt: management support from supervisors*
13. If the government provided HemoCues to health care workers following the end of the study, would you continue to test pregnant women for aneamia using HemoCue? If yes, why? If not, why?
14. Drawing on your experience, do you think it will be possible to test pregnant women for anaemia using a HemoCue as part of routine antenatal care in the primary health care system of Bangladesh? If so, how? If not, why? *Prompt: human and physical resources required, ongoing training and support.*
15. *Wrapping up* Is there anything else you would like to tell me about your experience of using a HemoCue to test pregnant women for anaemia?

Thank the participant for their time. Remind them that the information they shared will be kept confidential.

**Intravenous iron treatment**

**Section 1: Background**

*We would like to start with understanding a bit about your role in your current job and the health facility where you work:*

1. Could you please introduce yourself and tell me a little about yourself, including your current work position (roles and responsibilities) and what your training was in?
2. How would you describe the health facility you work in? *Prompt: well-resourced, understaffed*
3. How would you describe your workplace culture? *Prompt: collaborative, (un)supportive*

**Section 2: Anaemia in pregnant women and intravenous iron**

*Thank you for sharing. I would like to now focus on anaemia in pregnant women and administration of intravenous iron.*

1. Could you please tell me about your understanding of what anaemia in pregnant women is? *Prompt: how would you define anaemia in pregnant women*
2. How much of an issue do you think anaemia is in pregnant women? *Prompt: prevalence, consequences of anaemia in pregnancy*
3. How much of a priority is managing anaemia in pregnant women? *Prompt: Are there other conditions that are a higher priority?*
4. Could you please tell me about your understanding of the process of administering an intravenous iron intervention for pregnant women with anaemia?
5. Could you please tell me about the training you received (from icddr,b) for administering an intravenous iron intervention for pregnant women with anaemia? *Prompt: quality of the training, type of training (e.g., hands-on, interactive)*
6. Do you feel any additional training on administering an intravenous iron intervention for pregnant women with anaemia is needed? If so, what would you like to receive training on?
7. How many pregnant women with anaemia receive intravenous iron each day? Do you think your health facility has the capacity to administer intravenous iron to more pregnant women with anaemia per day? If no, why?
8. Could you tell me what the process is when a pregnant woman arrives at your health facility for intravenous iron?
9. Do you think any part of this process could be improved? If yes, how?
10. Do you think you are able to clearly describe the procedure for intravenous iron administration to pregnant women and address any questions or concerns they or their family may have?
11. Could you please tell me about your experience of administering intravenous iron for pregnant women with anaemia? *Prompt: easy, time-consuming, additional workload.*
12. On average, how long did it take you to administer intravenous iron for one pregnant woman?
13. Did you encounter any challenges or problems when administering intravenous iron to pregnant women?
14. Could you please tell me about your experience of monitoring pregnant women after they had received intravenous iron?
15. How do you think administering intravenous iron for pregnant women with anaemia differs from other treatment methods, like oral iron and folic acid supplements or blood transfusion?
16. Have any pregnant women experienced adverse events whilst receiving intravenous iron treatment for anaemia? If yes, what adverse events, and how did you deal with the situation?
17. How have pregnant women with anaemia perceived intravenous iron treatment? *Prompt: high/low acceptability, misconceptions, satisfied/dissatisfied, benefits.*
18. How have other health workers in your health facility engaged with administering an intravenous iron intervention for pregnant women with anaemia? *Prompt: enthusiastic, unwilling*
19. How do you feel about administering an intravenous iron intervention for pregnant women with anaemia?
20. Is there anything that could be done to improve the process of intravenous iron administration for pregnant women with anaemia at your health facility?
21. Drawing on your experience, do you think it will be possible to implement an intravenous iron intervention for pregnant women with anaemia in the Bangladesh primary health care system?If so, how? If not, why? *Prompt: human and physical resources required, ongoing training and support, community engagement*
22. *Wrapping up* Is there anything else you would like to tell me about your health facility and your experience of administering intravenous iron for pregnant women with anaemia?

Thank the participant for their time. Remind them that the information they shared will be kept confidential.
